# Supplementary material for: Quantification of porcine myocardial perfusion with modified dual bolus MRI – a prospective study with a PET reference
Source: Springer Nature journal article supplement (doi:10.1186/s12880-019-0359-8), 2019-07-26
Supplement: MOESM3 [file 17006376]

### Additional file 3

#### Recalculated mean values of *MBF*, when data of pig #2 rest study is excluded.

Table S3.1. The mean values of MBF (mean±SD) in stress and rest determined with PET, the modified dual bolus method and the dual bolus method. Data of pig #2 rest study is excluded.

|                                 | <i>MBF<sub>stress</sub></i><br>(ml/g/min) | <i>MBF<sub>rest</sub></i><br>(ml/g/min) |
|---------------------------------|-------------------------------------------|-----------------------------------------|
| PET (mean ± SD)                 | 4.44 ± 0.82                               | 1.49 ± 0.38                             |
| Modified dual bolus (mean ± SD) | 3.63 ± 0.66*                              | 1.36 ± 0.63                             |
| Dual bolus (mean ± SD)          | 2.17 ± 0.91*                              | 1.19 ± 0.66*                            |

\*Statistically significantly different compared to PET ( $p < 0.01$ ), Wilcoxon signed rank sum test.
