# Supplementary material for: Quantification of porcine myocardial perfusion with modified dual bolus MRI – a prospective study with a PET reference
Source: BMC Med Imaging. 2019 Jul 26;19:58. doi: 10.1186/s12880-019-0359-8 (PMC6660956; doi:10.1186/s12880-019-0359-8)
Supplement: Supplementary file 1 — The segments included in analysis and heart rates during perfusion imaging. (PDF 7 kb) [file 12880_2019_359_MOESM1_ESM.pdf]

## Additional file 1

### The segments included in analysis and heart rates during perfusion imaging

Table S1.1. The segments included in results and heart rates (*HR*) during high and low concentration contrast agent injections in stress and rest for each pig.

| Pig | Included segments*,<br>stress      | Included segments*,<br>rest            | <i>HR</i> stress low/high | <i>HR</i> rest low/high |
|-----|------------------------------------|----------------------------------------|---------------------------|-------------------------|
| #1  | Basal: 1, 5-11<br>Apex: 1,7-8      | Basal 1,8-9, 15<br>Apex 1, 3-8         | 112/110                   | 100/100                 |
| #2  | Basal: 6-9, 13-14<br>Apex: 4, 7-8  | Basal 6-8, 14-15<br>Apex 4, 7-8        | 76/72                     | 51/75                   |
| #3  | -                                  | Basal 1,8,10-16<br>Apex 4-8            | -                         | 76/75                   |
| #4  | Basal: 7, 13-15<br>Apex: 2-4, 6-7  | Basal: 1-3, 7-8, 13-16<br>Apex: 4, 7-8 | 62/59                     | 63/63                   |
| #5  | Basal: 4-9, 11, 13-16<br>Apex: 1-8 | Basal: 1-6, 10-16<br>Apex: 1-3, 5-8    | 64/57                     | 65/64                   |

\*Numbers of the segments are present in main manuscript in figure 1.
